# Supplementary material
Source: PubMed Central journal article supplement (PMC6535548)
Supplement: AAC.00236-19-s0001.pdf [file AAC.00236-19-s0001.pdf]

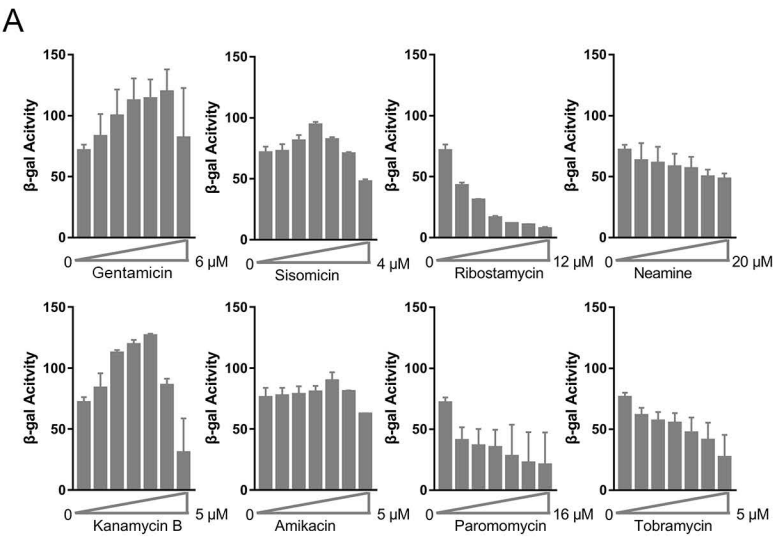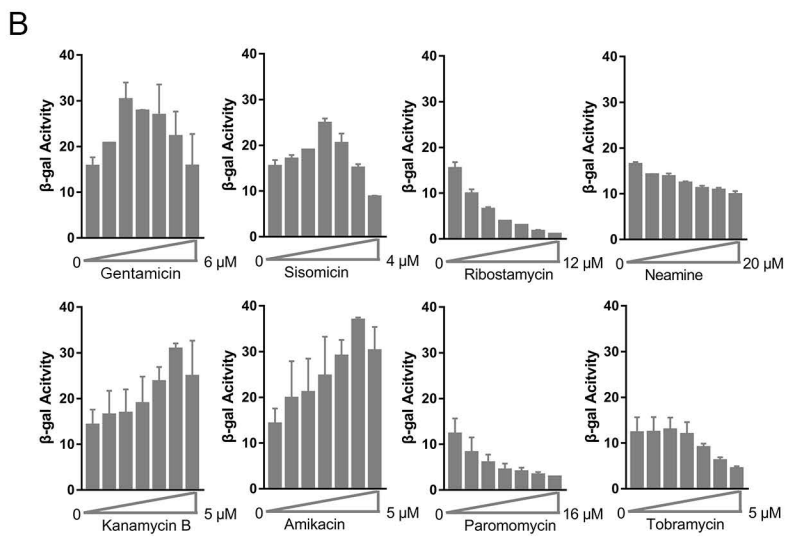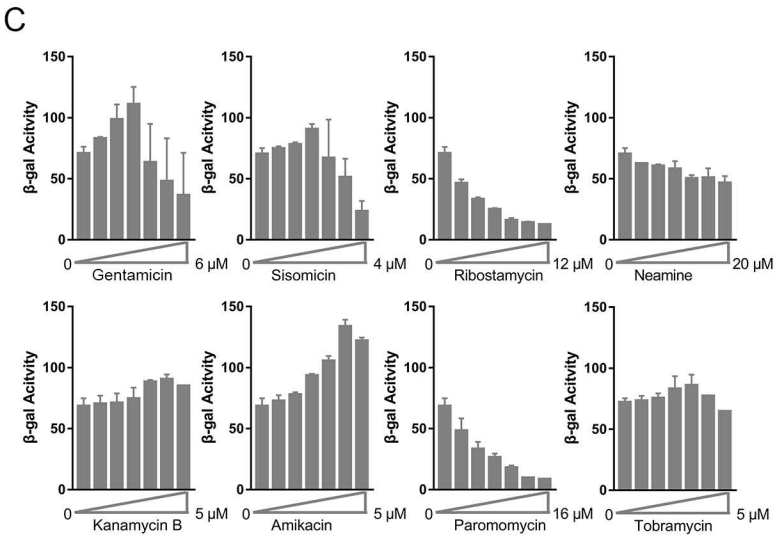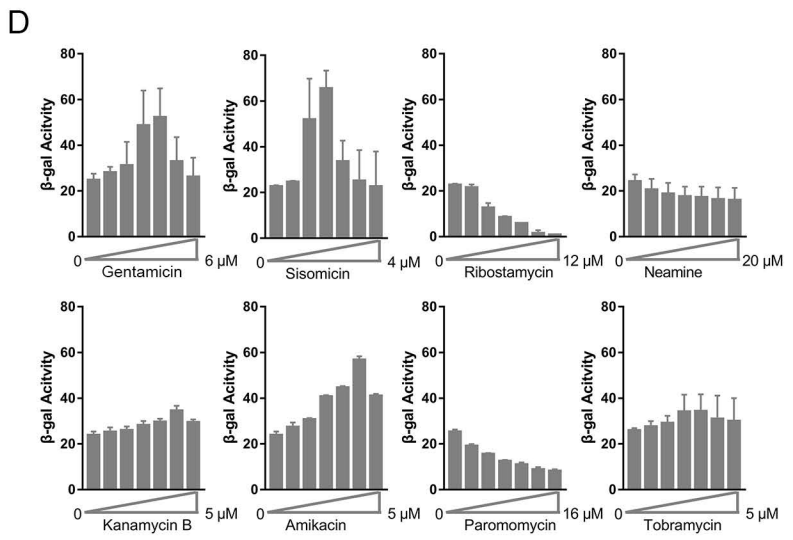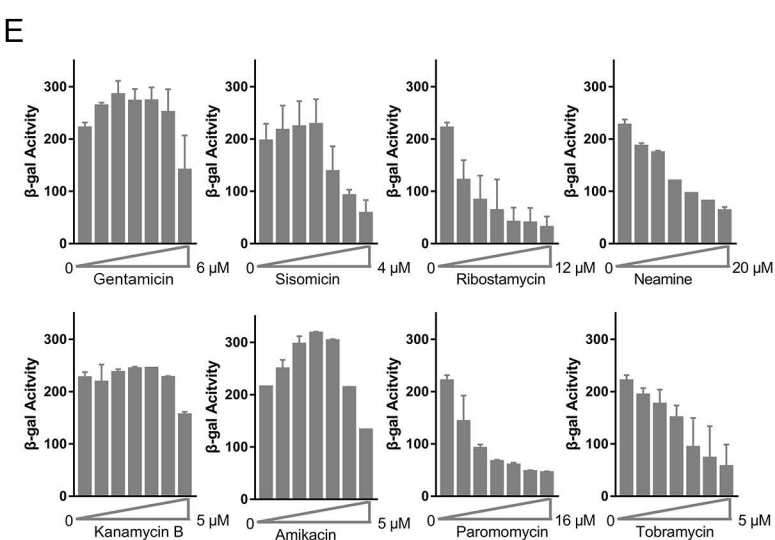

**Supplementary Figure1.**

The  $\beta$ -gal activity (Miller units) of the reporter gene with (A) aac-1, (B) aac-2, (C) aac-3, (D) aac-4, (E) aac-5 upon titration of aminoglycosides. Error bars are standard deviations of at least three independent experiments.

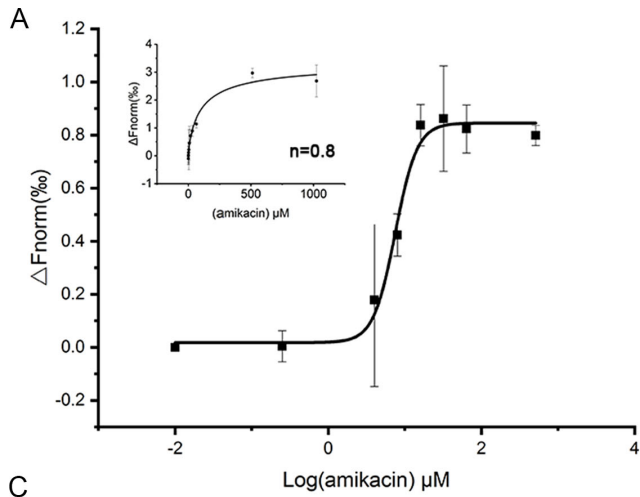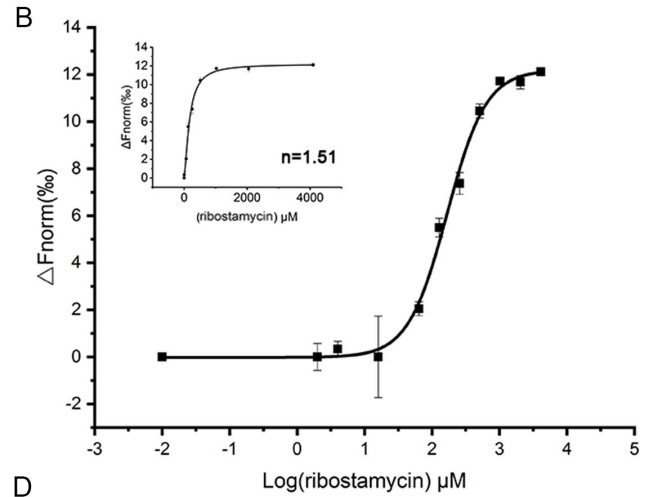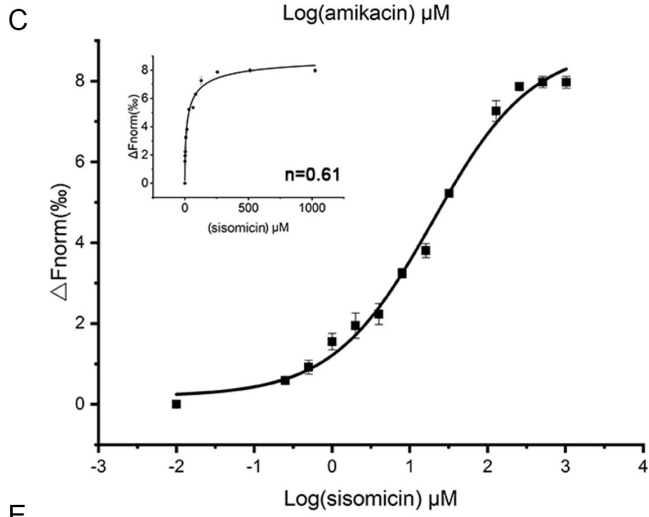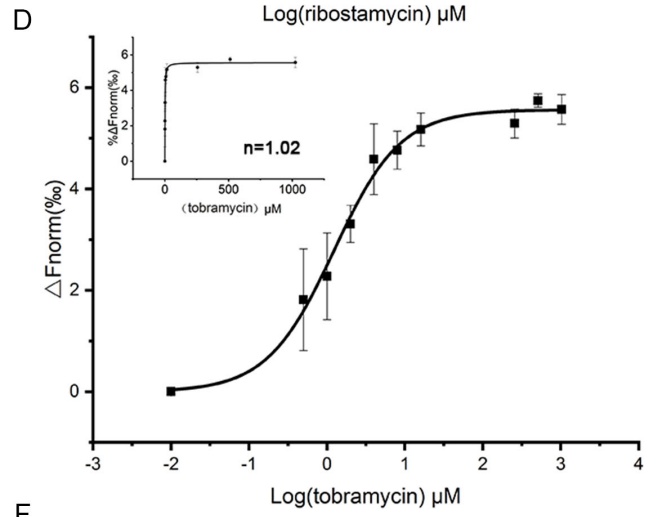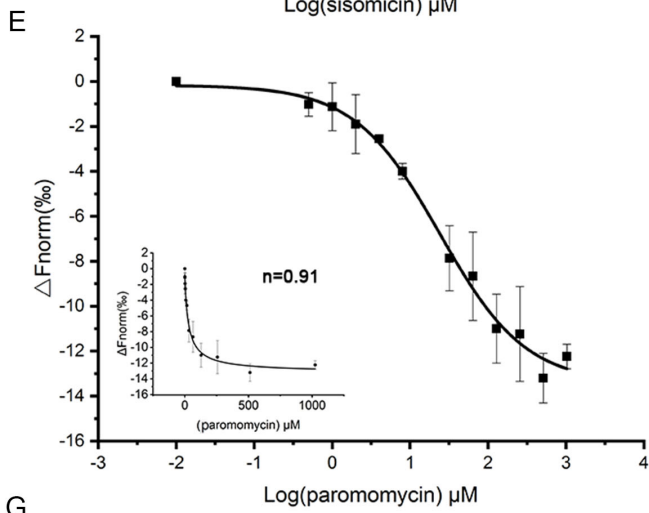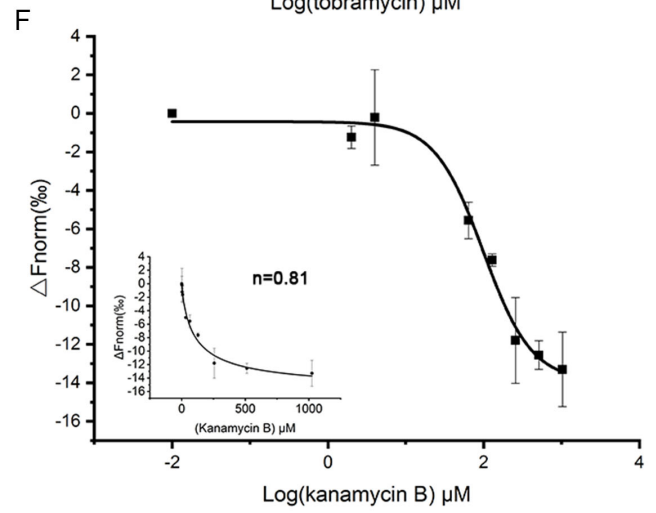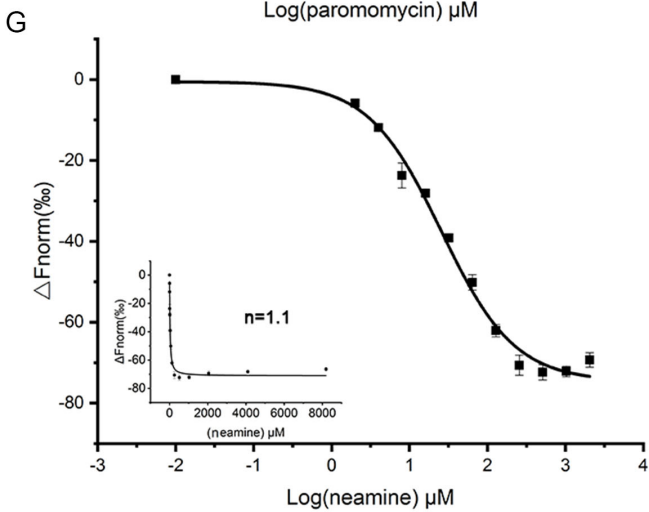

## Supplementary Figure 2.

Binding curves of aac-6 leader RNA riboswitch that bind with (A) amikacin, (B) ribostamycin, (C) sisomicin, (D) tobramycin, (E) paromomycin, (F) kanamycin B, (G) neamine. Inset is the Hill plot of aminoglycoside antibiotic binding and the Hill coefficient(n). Error bars are standard deviations of at least three independent experiments.

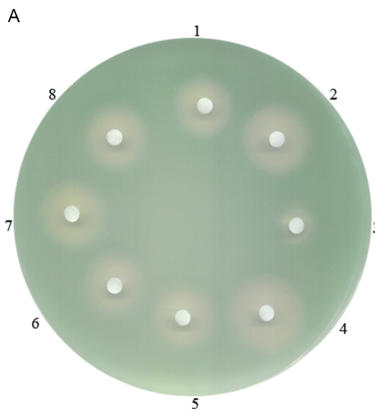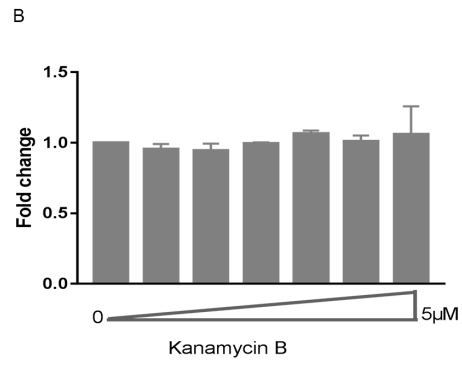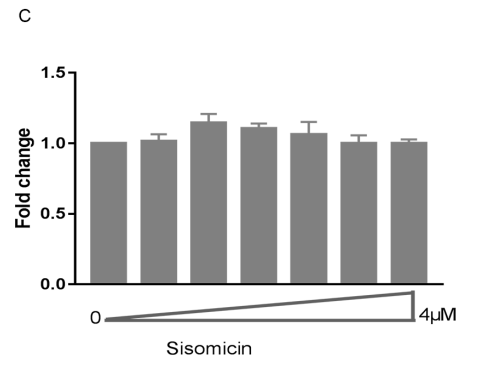

### Supplementary Figure3.

(A) Agar diffusion assays of cells transformed with the reporter plasmid containing the leader RNA of *ghoS* on plate with x-gal. Each filter disc was spotted with different aminoglycoside antibiotics: 1, sisomicin; 2, gentamycin; 3, neamine; 4, ribostamycin; 5, kanamycin B; 6, amikacin; 7, paromomycin; 8, tobramycin. (B and C) The  $\beta$ -gal activity (Miller units) of *ghoS* with (B) kanamycin B and (C) sisomicin

**Supplementary Table 1.** Leader RNA, control and covariance model sequences.

| <b>Name</b>                           | <b>Accession number</b>    | <b>annotation</b>               | <b>sequence</b>                                                                       |
|---------------------------------------|----------------------------|---------------------------------|---------------------------------------------------------------------------------------|
| AAC in <i>Pseudomonas fluorescens</i> | L06163.1                   | <i>Pseudomonas fluorescens</i>  | GGAGCAGCAACGAUGUUACGCAGCAG<br>GGCAGUCGCCCUAAAACAAAGUUAGG<br>CAGCACGGAGACACUUCAGCAUG   |
| AAC-3                                 | DQ393782.1                 | <i>Pseudomonas aeruginosa</i>   | GGAGCAGCAACGAUGUUACGCAGCAG<br>GGCAGUCGCCCUAAAACAAAGUUAGG<br>CAGCACAGAGCGACCAUUUCAUG   |
|                                       | EU886980.1                 | <i>Pseudomonas aeruginosa</i>   |                                                                                       |
|                                       | GU934609.1                 | <i>Pseudomonas aeruginosa</i>   |                                                                                       |
|                                       | GU966684.1                 | <i>Pseudomonas aeruginosa</i>   |                                                                                       |
|                                       | HM175875.1                 | <i>Pseudomonas aeruginosa</i>   |                                                                                       |
|                                       | HM366563.1                 | <i>Pseudomonas aeruginosa</i>   |                                                                                       |
|                                       | M29695.1                   | <i>Pseudomonas aeruginosa</i>   |                                                                                       |
|                                       | FJ917747                   | <i>Pseudomonas aeruginosa</i>   |                                                                                       |
|                                       | EF105290.1                 | <i>Riemerella anatipestifer</i> |                                                                                       |
| AAC-6                                 | AJ878850.1                 | <i>Pseudomonas aeruginosa</i>   | GGAGCAGCAACGAUGUUACGCAGCAG<br>GGCAGUCGCCCUAAAACAAAGUUAGG<br>CAGCACAAAGAGCGUCCUCAUG    |
|                                       | FJ495083.1                 | <i>Pseudomonas aeruginosa</i>   |                                                                                       |
|                                       | GU784921.1                 | <i>Pseudomonas aeruginosa</i>   |                                                                                       |
| AAC-2                                 | <a href="#">KJ668707.1</a> | <i>Enterobacter hormaechei</i>  | GGAGCAGCAACGAUGUUACGCAGCAG<br>GGCAGUCGCCCUAAAACAAAGUUAGG<br>CcCGCACGGAAUCAACA.UCUCAUG |
| AAC-4                                 | AY623046.1                 | artificial sequences            | GGAGCAGCAACGAUGUUACGCAGCAG<br>GGCAGUCGCCCUAAAACAAAGUUAGG<br>CAUCACAAAGUACAGCAUCGUG    |
|                                       | AF439785.3                 | <i>Campylobacter jejuni</i>     |                                                                                       |
|                                       | AF439786.3                 | <i>Campylobacter jejuni</i>     |                                                                                       |
|                                       | Y11946.1                   | <i>Enterobacter cloacae</i>     |                                                                                       |

|                            |                        |                                |                                                                                     |
|----------------------------|------------------------|--------------------------------|-------------------------------------------------------------------------------------|
|                            | Y11948.1               | <i>Enterobacter cloacae</i>    |                                                                                     |
|                            | EF370423.1             | <i>Escherichia coli</i>        |                                                                                     |
|                            | EU434618.1             | <i>Psychrobacter pulmonis</i>  |                                                                                     |
|                            | L25617.1               | <i>Pseudomonas fluorescens</i> |                                                                                     |
|                            | L25666.1               | <i>Pseudomonas fluorescens</i> |                                                                                     |
|                            | FJ715945.1             | <i>Pseudomonas aeruginosa</i>  |                                                                                     |
|                            | EU819087.1             | <i>Pseudomonas aeruginosa</i>  |                                                                                     |
|                            | JF412713.1             | <i>Pseudomonas aeruginosa</i>  |                                                                                     |
|                            | FN554982.1             | <i>Pseudomonas aeruginosa</i>  |                                                                                     |
|                            | FN554976.1             | <i>Pseudomonas aeruginosa</i>  |                                                                                     |
|                            | HQ832472.1             | <i>Pseudomonas aeruginosa</i>  |                                                                                     |
|                            | HQ832473.1             | <i>Pseudomonas aeruginosa</i>  |                                                                                     |
|                            | JN003857.1             | <i>Pseudomonas aeruginosa</i>  |                                                                                     |
|                            | FN554980.1             | <i>Pseudomonas aeruginosa</i>  |                                                                                     |
|                            | FN554979.1             | <i>Pseudomonas aeruginosa</i>  |                                                                                     |
|                            | X60321.1               | <i>Pseudomonas aeruginosa</i>  |                                                                                     |
|                            | FN554978.1             | <i>Pseudomonas aeruginosa</i>  |                                                                                     |
| AAC-5                      | AJ937775.1             | <i>Yersinia sp.</i>            | GGAGCAGCAACGAUGUUACGCAGCAG<br>GGCAGUCGCCCUAAAACAAAGUUGGG<br>CGAACCCGGAGCCUCAUUAAUUG |
| >NZ_MC<br>JD01000<br>190.1 | >NZ_MCJD0<br>1000190.1 | <i>Citrobacter freundii</i>    | GGAGCAGCAACGAUGUUACGCAGCAG<br>GGCAGUCGCCCUAAAACAAAGUUAGG<br>CAGCACAAAGACCGUUCUCAUG  |
| >NZ_NI<br>OU0100<br>0114.1 | >NZ_NIOU0<br>1000114.1 | <i>Pseudomonas aeruginosa</i>  | GGAGCAGCAACGAUGUUACGCAGCAG<br>GGCAGUCGCCCUAAAACAAAGUUAGG<br>CAACACAGAGCGACCGUUUCAUG |



|                            |                        |                                   |                                                                                                           |
|----------------------------|------------------------|-----------------------------------|-----------------------------------------------------------------------------------------------------------|
| >NZ_NF<br>FD01000<br>041.1 | >NZ_NFFD0<br>1000041.1 | <i>Pseudomonas<br/>aeruginosa</i> | GGAGCAGUAACGAUGUUACGCAGCUG<br>GGCAGUCGCCCCGAAAACAAAGUUAGG<br>CAUCACAAAGUACAGCAUCGUG                       |
| >NZ_CP<br>024094.1         | >NZ_CP024<br>094.1     | <i>Escherichia<br/>coli</i>       | GGAGCAGCAACGAUGUUACGCAGCAG<br>GGCGUCGCCCUGAAAACAAAGUUAGGC<br>AUCACAAAGUACAGCAUCGUG                        |
| >NZ_AD<br>WQ0100<br>0050.1 | >NZ_ADWQ<br>01000050.1 | <i>Escherichia<br/>coli</i>       | GGAGCAGCAACGAUGUUACGCAGCAG<br>GGCAGUCGCCCUGAAAACAAAGUUAAA<br>CAUCAUGAGGGAUAGGCCGCAUG                      |
| >NC_01<br>2555.1           | >NC_01255<br>5.1       | <i>Enterobacter<br/>cloacae</i>   | GGAGCAGCAACGAUGUUACGCAGCAG<br>GGCAGUCGCCCUGAAAACAAAGUUAGG<br>cCCGCACGGAAUCAACAUCUCAUG                     |
| >NZ_LO<br>DH0100<br>0098.1 | >NZ_LODH0<br>1000098.1 | <i>Pseudomonas<br/>aeruginosa</i> | GGAGCAGCAACGAUGUUACGCAGCAG<br>GGCAGUCGCCCUGAAAACAAAGUUAGG<br>CAGCAAAGAGCAGCCCCCUCGGUUA<br>CGGAAGCUACGAAUG |
